# Supplementary material
Source: PubMed Central journal article supplement (PMC3443158)
Supplement: 1209396109_pnas.201209396SI.pdf [file 1209396109_pnas.201209396SI.pdf]

# Supporting Information

Hernández-Oñate et al. 10.1073/pnas.1209396109

## SI Materials and Methods

**Suppression of Mechanical Injury–Induced Sporulation by 5-Fluorouracil.** The assays of treatment with 5-fluorouracil (5-FU) was done as described previously by Galun and Gressel (1). Seven sheets of sterile Whatman no. 1 filter paper were soaked in 3 mL of potato dextrose broth (PDB) (Difco) in 8.5-cm Petri dishes, with a sheet of sterile hardened filter paper (Whatman; no. 50) placed at the bottom of the plate. Plugs of mycelium were placed in the center of the filter paper. Cultures were kept in the dark at 28 °C for 36 h, and then mycelium was injured and incubated for 4, 8, and 12 h. The filter paper with the mycelium adhered was immediately transferred 30 min to a plate containing 50 µg of 5-FU in PDB. The filter paper with the treated mycelium was washed with distilled water to remove excess 5-FU and transferred into a plate with fresh PDB. Cultures were incubated for an additional 48 h in the dark and photographed. For the 0-h treatment, the cultures were incubated for 10 min before and 20 min after injury. For the untreated control, the culture was transferred to a plate containing only PDB. Growth and treatments were carried out at 28 °C in the dark.

**Effect of Antioxidants and DPI Inhibitor in Mechanical Injury–Induced Conidiation.** For treatments with ascorbic acid, fungal colonies grown on filter paper with PDB (as described above for the effect of 5-FU) were transferred to plates containing a 30 mM ascorbic acid solution and incubated for 10 min before and 20 min after injury, and then the filter paper with the treated mycelium was washed with distilled water to remove excess AA and transferred to a plate with fresh PDB. Colonies were photographed after an additional 48 h of incubation. For this study, two controls were made, an untreated control and other treated with water. For assays with NAC, plugs of mycelium were inoculated in plates with MMV-CN supplemented with 60 mM NAC. Cultures were incubated for 40 h; mycelium was injured with a scalpel and photographed after an additional 48 h of incubation. Two controls were prepared: the first control consisted of only MMV-CN, and NAG (Sigma) was added to the second control.

To determine the effect of the NADPH oxidase inhibitor DPI in mechanical injury-induced conidiation, plugs of mycelium were microcultivated in MMV-CN on microscope slides. Microcultures were incubated in the dark at 28 °C for 24 h and then incubated in liquid MMV-CN with 50 mM DPI (DPI was dissolved in DMSO) for 10 min before and 20 min after injury. Microcultures were then transferred to a new plate and incubated for an additional 48 h. Two controls were used in the experiment, one untreated control and another control using MMV-CN with less than 1% of DMSO. Photographs in all assays were taken after an additional 48 h of incubation. All cultures and treatments were carried out in the dark and incubated at 28 °C.

**Functional Annotation of Differentially Expressed Genes.** For annotation of differential genes, a first analysis was performed using a BLASTP comparing against Fungal Functional Catalogue Database (FunCatDB) (2) with an  $E$  value of  $\leq 1e^{-5}$ . Additionally, a BLASTP was done against the proteins encode in the genomes of other fungi [*Trichoderma reesei* (*Tr*) (3) (<http://genome.jgi-psf.org/Trire2/Trire2.home.html>); *Neurospora crassa* (*Nc*) (<http://www.broad.mit.edu/annotation/genome/neurospora/Home.html>); *Fusarium graminearum* (*Fg*) ([http://www.broad.mit.edu/annotation/genome/fusarium\\_graminearum/MultiHome.html](http://www.broad.mit.edu/annotation/genome/fusarium_graminearum/MultiHome.html)); *Fusarium oxysporum* (*Fo*) ([http://www.broadinstitute.org/annotation/genome/fusarium\\_group/MultiHome.html](http://www.broadinstitute.org/annotation/genome/fusarium_group/MultiHome.html)); and *Aspergillus nidulans* (*An*)

([http://www.broadinstitute.org/annotation/genome/aspergillus\\_group/MultiHome.html](http://www.broadinstitute.org/annotation/genome/aspergillus_group/MultiHome.html))], using an  $E$  value of  $\leq 1e^{-5}$ . A second BLASTP was done against nonredundant database (nr) of the NCBI (<http://www.ncbi.nih.gov>) using an  $E$  value of  $\leq 1e^{-10}$ . Subsequently, all proteins deduced from genes regulated in early times by injury (933) and 592 genes regulated for late times were compared against the Pfam database using the Web Server Batch Sequence Search (<http://pfam.sanger.ac.uk/search#tabview=tab1>) with a cutoff of  $E$  value of  $\leq 1e^{-2}$ . Finally, all data were analyzed manually. Expression patterns identified by agglomerative hierarchical clustering, the clustering was performed using smooth correlation and average linkage clustering in GeneSpring GX 7.3.1 software (Agilent Technologies).

**Complementation of  $\Delta nox1$  and  $\Delta noxR$  Mutants with the WT  $nox1$  and  $noxR$  Genes.** The entire ORFs of *Nox1* and *NoxR*, including 2.0 kb of native promoters and 1.5 kb terminator sequences, were amplified using Phusion High Fidelity Taq polymerase (New England Biolabs). The primer combination oAM-LU108/oAM-LU80 (Table S1) was used for *Nox1* (PCR product, 5.3 kb) and oAM-LU92/oAM-LU11 for *NoxR* (PCR product 5.5-kb). The PCR products were cleaned up and dATP-tailed using Faststart polymerase (Roche) before subcloning in pCR2.1 vector. The resulting plasmids pCR2.1-*NoxAc* and pCR2.1-*NoxRc* were sequenced and cotransformed with plasmid pII99 (kindly provided by Barry Scott, Institute of Molecular BioSciences and National Bio-Protection Research Center, Massey University, New Zealand) in the  $\Delta nox1-15$  strain and  $\Delta noxR-6$ , respectively. pII99 contains a Geneticin-resistance cassette. Protoplasts were selected in 3 mg of Geneticin per milliliter of PDA. The resulting transformants were tested for their ability to conidiate after mechanical injury with a scalpel. The presence of the *nox1* and *noxR* genes was confirmed by PCR.

**Confirmation of the Mutants  $\Delta nox1$ ,  $\Delta nox2$ , and  $\Delta noxR$  by PCR.** To screen for gene-replacement events, DNA of hygromycin-resistant colonies was subjected to a first PCR using primers ORFnox1-forward (F) and ORFnox1-reverse (R), ORFnox2-F and ORFnox2-R, ORFnoxR-F, and ORFnoxR-R to detect the ORFs of *nox1* (PCR product, 1.7 kb), *nox2* (PCR product, 1.8 kb), and *noxR* (PCR product, 1.8 kb), respectively. In a second PCR, gene-replacement events by double homologous recombination were confirmed using the following primers: for the *nox1* mutant, the forward primer Pnox1-F and reverse primer hygR (PCR product 2.7 kb); for the *nox2* mutant, the forward primer Pnox2-F and reverse primer hygR (PCR product 2.8 kb); and for the *noxR* mutant, the forward primer PnoxR-F and reverse primer hygR (PCR product, 2.6 kb). All colonies that showed no amplification of the ORF and produced the expected amplification product in the second PCR were considered confirmed mutants. For all PCR reactions, DNA of the WT strain was used as control. PCR was performed using Taq polymerase (Invitrogen) under the following thermal cycling conditions: 3 min at 95 °C, followed by a total of 35 cycles of 30 s at 95 °C, 30 s at 60 °C, 1 min per kilobase at 72 °C, and 5 min at 72 °C. The sequences of primers used are shown in the Table S1.

**ROS Detection Assays.** Plugs of mycelia of the WT strain were inoculated in plates of PDA or MMV-CN and incubated in the dark at 28 °C. After 36 h, the colony was cut and incubated under the same conditions for 0, 1, 3, and 5 min after injury. After each time, small mycelial samples were scraped, placed immediately on a slide with 0.3 mM nitroblue tetrazolium chloride (NBT) (Sigma) aqueous solution, and incubated for 30 min in the dark at 28 °C.

Samples were photographed under an inverted microscope. The same procedure was followed to detect hydrogen peroxide; samples of mycelium of 1 min after injury were incubated in the presence of 40 mM 5-(and 6)-carboxy-2'-7'-dichlorodihydrofluorescein diacetate (H2DCFDA) (Sigma) aqueous solution.

H2DCFDA samples were observed using an Olympus 1× 71 inverted fluorescence microscope using 460- to 490-nm excitation, 500- to 550-nm emission, and a dichromatic mirror of 500-nm wavelengths. Nonspecific NBT and DCF staining was observed only after prolonged incubation with NBT or H2DCFDA.

1. Galun E, Gressel J (1966) Morphogenesis in *Trichoderma*: Suppression of photoinduction by 5-fluorouracil. *Science* 151:696–698.  
 2. Ruepp A, et al. (2004) The FunCat, a functional annotation scheme for systematic classification of proteins from whole genomes. *Nucleic Acids Res* 32:5539–5545.

3. Kubicek CP, et al. (2011) Comparative genome sequence analysis underscores mycoparasitism as the ancestral life style of *Trichoderma*. *Genome Biol* 12:R40.

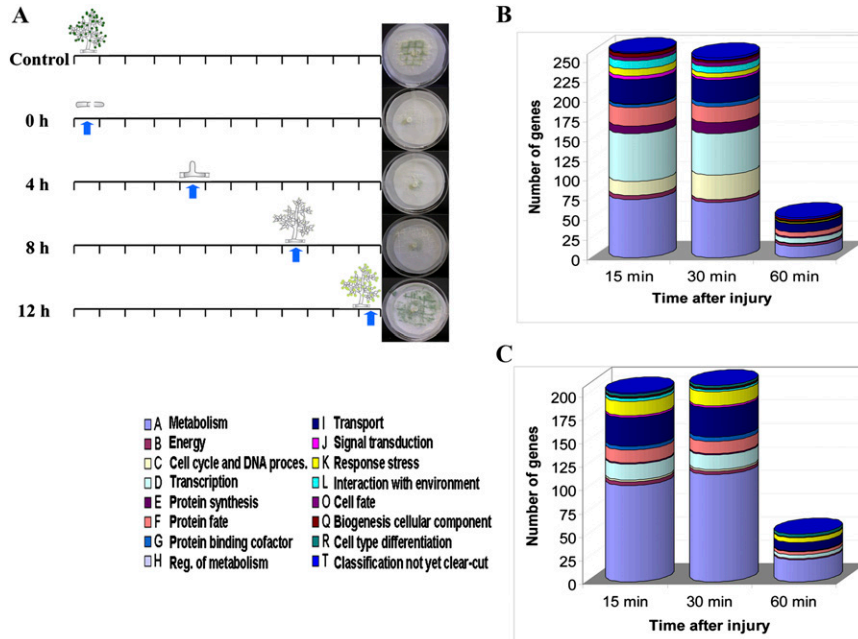

**Fig. S1.** Effect of 5-FU on injury induced conidiation and FunCat analysis of genes regulated in injury response. (A) Effect of 5-FU on injury induced conidiation. The inhibitor was applied at the indicated times (blue arrows) and photographed 48 h after injury. As control, the treatment was carried out without inhibitor. Drawings represent the stages at which the developmental program is interrupted. (B) Functional classification of injury induced genes. (C) Functional classification of injury repressed genes. (B and C) Graphs show the classification of genes differentially expressed at the indicated times after injury. Unclassified genes were not considered for the graph.

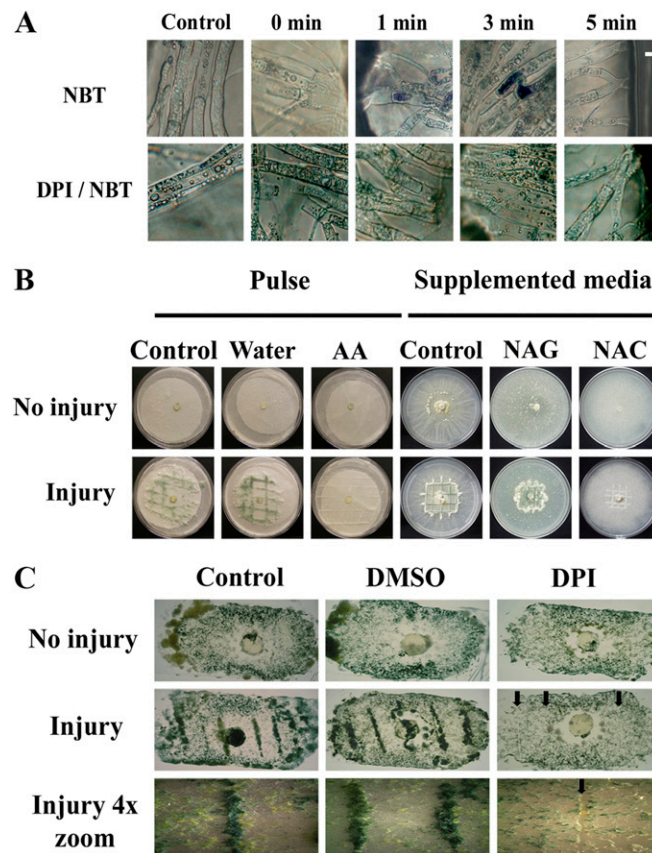

**Fig. S2.** ROS production and antioxidants affect injury-induced conidiation. (A) Production of superoxide in response to injury is blocked by DPI. Samples of mycelium were incubated in a 0.3 mM NBT solution; on the other hand, the samples were first incubated in 50 mM DPI for 10 min before and 20 min after injury and then were incubated in 0.3 mM NBT for 30 min. The samples were examined by bright-field microscopy (BF). A blue/purple coloration indicates the production of superoxide (Formazan generation). (B) Antioxidants repress injury-induced conidiation. (Left) A *T. atroviride* colony was injured after exposure to a pulse of 30 mM ascorbic acid (AA). (Right) Fungus grown in the presence of 60 mM NAC and then injured. A NAG-treated (60 mM), water-treated, and an untreated colony were used as controls. (C) The NADPH oxidase inhibitor DPI blocks injury-induced conidiation. A colony of *T. atroviride* was injured in the presence of DPI or DMSO as a negative control. Black arrows indicate the damaged area. Photographs of *T. atroviride* colonies were taken 48 h after injury. Photographs taken in a 4x stereo microscope are included in B for better appreciation.

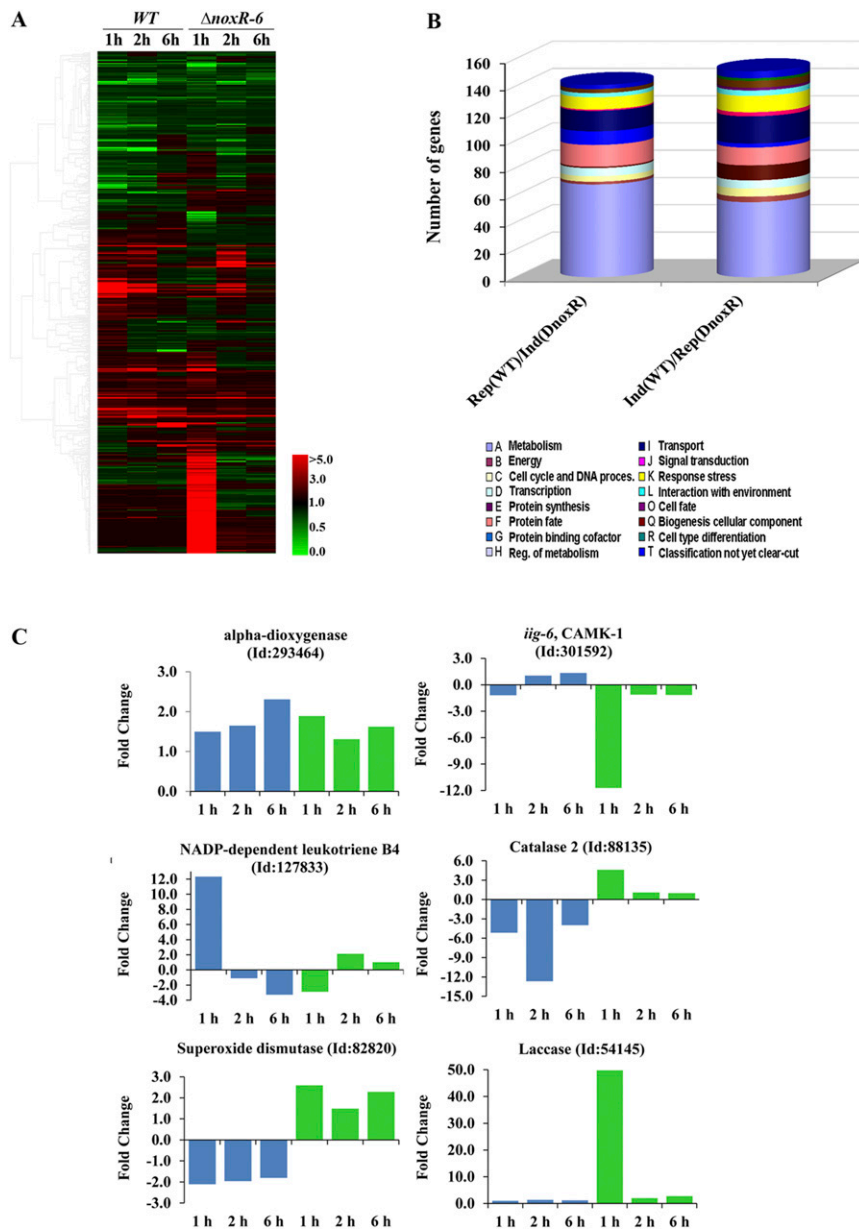

**Fig. S3.** Transcriptome analysis of WT and  $\Delta noxR$  strains in response to mechanical injury in late times. (A) Transcriptome comparison of WT and  $\Delta noxR$  strains. Hierarchical clustering of temporal expression of 592 injury-responsive genes was performed using smooth correlation and average linkage clustering in GeneSpring GX 7.3.1 software (Agilent Technologies). A total of 189 genes are induced in response to injury only in the WT strain and are repressed or not responsive in the  $\Delta noxR$  mutant; in contrast, 300 genes are repressed or not responsive in the WT strain and induced in the  $\Delta noxR$  mutant. (B) Functional classification of injury regulated genes. Graphs show the classification of total repressed genes or not responsive in the WT strain and induced in the  $\Delta noxR$  mutant [Rep(WT)/Ind( $\Delta noxR$ )] and total induced genes in WT strain and repressed or not responsive in the  $\Delta noxR$  mutant [Ind(WT)/Rep( $\Delta noxR$ )]. Unclassified genes were not considered for the graph. (C) Comparison of level expression of some genes regulated in WT and  $\Delta noxR$  in injury response. The graphs represent the fold change that have genes at the times indicated in WT strain (blue bars) and  $\Delta noxR$  mutant (green bars) in response to mechanical injury.





Table S1. Primers used in this work

| Id Prot. Tav2* | Gene name            | Primer name | Sequence 5' to 3'                                                        | Analysis         |
|----------------|----------------------|-------------|--------------------------------------------------------------------------|------------------|
| 127833         | <i>iig-1</i>         | Ficont02053 | TGGTCTCGCCGATCTGGACGGG                                                   | Northern blot    |
|                |                      | Ricont02053 | GGATGGAGAGATTCTGGTTGAGG                                                  | Northern blot    |
| 297699         | <i>iig-2</i>         | Ficont20013 | ATTCTGCTTGCAGCCAGC                                                       | Northern blot    |
|                |                      | Ricont20013 | CAACACCAAGATGAAGTCCGTCG                                                  | Northern blot    |
| 297381         | <i>iig-3</i>         | Ficont16107 | CCGTTGCAAGAGAACTGACGCC                                                   | Northern blot    |
|                |                      | Ricont16107 | ACGATGCCTGCGGCTGAG                                                       | Northern blot    |
| 33350          | <i>iig-4</i>         | Ficont01196 | TGGAGCAGATCTAGCTCTTG                                                     | Northern blot    |
|                |                      | Ricont01196 | CATTCCGAGGTTTGGTCGAG                                                     | Northern blot    |
| 36070          | <i>iig-5</i>         | Ficont04483 | AGCTAGCGAAGGATTGCGCATC                                                   | Northern blot    |
|                |                      | Ricont04483 | ATCGCGCAACCGGAAGC                                                        | Northern blot    |
| 301592         | <i>iig-6</i>         | camk301592F | TTCGCCAACATGCTCAATC                                                      | Northern blot    |
|                |                      | camk301592R | GAGGCGTCGCTAAAGCTAC                                                      | Northern blot    |
| 126859         | <i>iig-7</i>         | cytb126859F | GCTTCATAACCATGCCAGAG                                                     | Northern blot    |
|                |                      | cytb126859R | TGTAATCTTTGCAACAGCGCCTG                                                  | Northern blot    |
| 314604         | <i>iig-8</i>         | bzip314604F | GGTTGTGGCAGACCGTAGTC                                                     | Northern blot    |
|                |                      | bzip314604R | CTCATCCATACCAACAAGCGTCTC                                                 | Northern blot    |
| 219770         | <i>iig-9</i>         | metA219770F | TGGTGGTTACGGATACGACAAC                                                   | Northern blot    |
|                |                      | metA219770R | AGGTCGCGTCACAGTTCAAG                                                     | Northern blot    |
| 297389         | <i>irg-1</i>         | Frcont03522 | TCTGGCGCCGAGCGTGTTG                                                      | Northern blot    |
|                |                      | Rrcont03522 | ATAGCCAATGGCGCCACAC                                                      | Northern blot    |
| 297668         | <i>irg-3</i>         | Frcont17073 | CTTGGCATGGACGACACGC                                                      | Northern blot    |
|                |                      | Rrcont17073 | CCAGGCACCATTGGACCTCTGC                                                   | Northern blot    |
| 300386         | <i>irg-4</i>         | Frcont15790 | AAATCCCGCATGGCAAGG                                                       | Northern blot    |
|                |                      | Rrcont15790 | GAGGTATGGTTATCCAGCTC                                                     | Northern blot    |
| 297186         | <i>irg-5</i>         | Frcont18209 | GGTTAACCCCTGCTGATGTG                                                     | Northern blot    |
|                |                      | Rrcont18209 | TGACAAGCCCTGGATCGGC                                                      | Northern blot    |
| 300960         | <i>irg-6</i>         | Frcont20402 | TCTCTGCAAGACGAGAGTTGC                                                    | Northern blot    |
|                |                      | Rrcont20402 | TTCGTTGGGATGCTCGTAAGC                                                    | Northern blot    |
| 253020         | <i>irg-7</i>         | Ficont01499 | CTCAAAGCTGCAAAGCAACTCG                                                   | Northern blot    |
|                |                      | Ricont01499 | GCGCCACATGGTGGTAG                                                        | Northern blot    |
| 155960         | <i>irg-8</i>         | cat2155960F | ACTCGAAATAAGGATTGTTGG                                                    | Northern blot    |
|                |                      | cat2155960R | CCGACATCATATTTACAAGC                                                     | Northern blot    |
| Hygromycin     | <i>hph</i>           | hygF        | GATCGACGTTAACTGATTTGAAGGAG                                               | Gene replacement |
|                | <i>hph</i>           | hygR        | CTATTCCTTGGCCCTGGACGAGTGCTG                                              | Gene replacement |
| 315943         | Promoter             | PnoxR-F     | GAC TCG TCT CTC ATA CGG AGA G                                            | Gene replacement |
|                | Promoter             | PQnoxR-R    | TGC TCC TTC AAT ATC AGT TAA CGT CGA<br>TCA GGG GGG TGA GAG GCA AAG AC    | Gene replacement |
| 302802         | Terminator           | TQnoxR-F    | CCC AGC ACT CGT CCG AGG GCA AAG GAA<br>TAG TGA CAT CTT GGC GAC ATG GC    | Gene replacement |
|                | Terminator           | TnoxR-R     | CAG ATC GCA GAC GCA GAG G                                                | Gene replacement |
|                | Next 5'              | N5'-noxR-F  | GTT AGC AGC AGC ATC TGA GC                                               | Gene replacement |
|                | Next 3'              | N3'-noxR-R  | GGA TCG CTG TGA GTG TGT GC                                               | Gene replacement |
|                | Promoter             | Pnox1-F     | CCG TTA CAA GTG CAC CTC TGT C                                            | Gene replacement |
|                | Promoter             | PQnox1-R    | TGC TCC TTC AAT ATC AGT TAA CGT CGA TCA<br>GGA CGC CTC GGG ATT TGA CC    | Gene replacement |
| 300495         | Terminator           | TQnox1-F    | CCC AGC ACT CGT CCG AGG GCA AAG GAA TAG TCT<br>GGA AGG AAG CAT GAA GAC G | Gene replacement |
|                | Terminator           | Tnox1-R     | GCA CCA TCG AGC ACT CAT ACC                                              | Gene replacement |
|                | Next 5'              | N5'-nox1-F  | CAC CGC AGC GAG CAA ATC C                                                | Gene replacement |
|                | Next 3'              | N3'-nox1-R  | TCA AGC ACC TTC ATC ACC ACG                                              | Gene replacement |
|                | Promoter             | Pnox2-F     | GTA TAA GCC ACG GAA TGC ACG                                              | Gene replacement |
|                | Promoter             | PQnox2-R    | TGC TCC TTC AAT ATC AGT TAA CGT CGA TCA GTC<br>TCC TTC TGT AGT ATC CCA G | Gene replacement |
|                | Terminator           | TQnox2-F    | CCC AGC ACT CGT CCG AGG GCA AAG GAA TAG<br>TCT GTG GAC CCA AGG GAT TGG   | Gene replacement |
|                | Terminator           | Tnox2-R     | CCT CGC TGG AGT TGT GCT G                                                | Gene replacement |
|                | Next 5'              | N5'-nox2-F  | GTC ACA GCT CTT GTC GCA TCG                                              | Gene replacement |
|                | Next 3'              | N3'-nox2-R  | CAA TGC CTC CGC CAC AGC C                                                | Gene replacement |
| 302802         | $\Delta$ <i>nox1</i> | ORFnox1-F   | TCTAGATGGATGGTAAGCCCTTCTC                                                | Confirmation     |
|                |                      | ORFnox1-R   | TTAGAAATGCTCTTCCAGAAGCG                                                  | Confirmation     |
